# Supplementary material for: Characterization of the Fungitoxic Activity on Botrytis cinerea of N-phenyl-driman-9-carboxamides
Source: MDPI journal article supplement (doi:10.3390/jof7110902), 2021-10-26

**Compound 4:** 2,5,5,8a-tetramethyl-N-phenyldecahydronaphthalene-1-carboxamide or N-phenyl-driman-9-carboxamide.

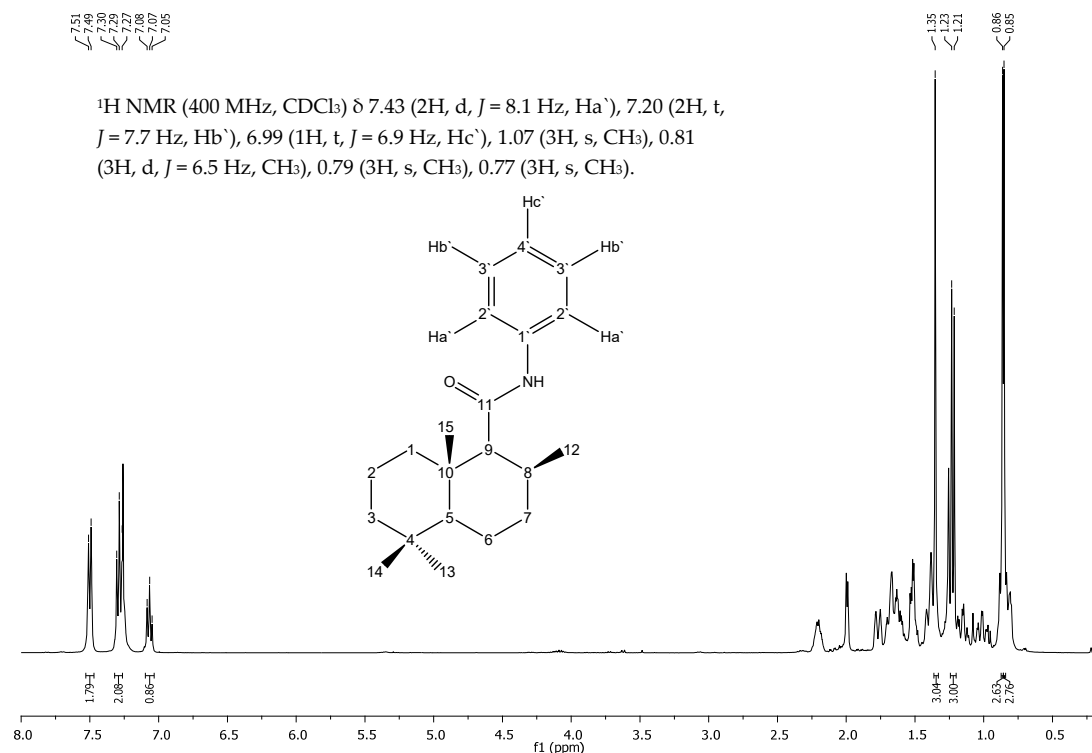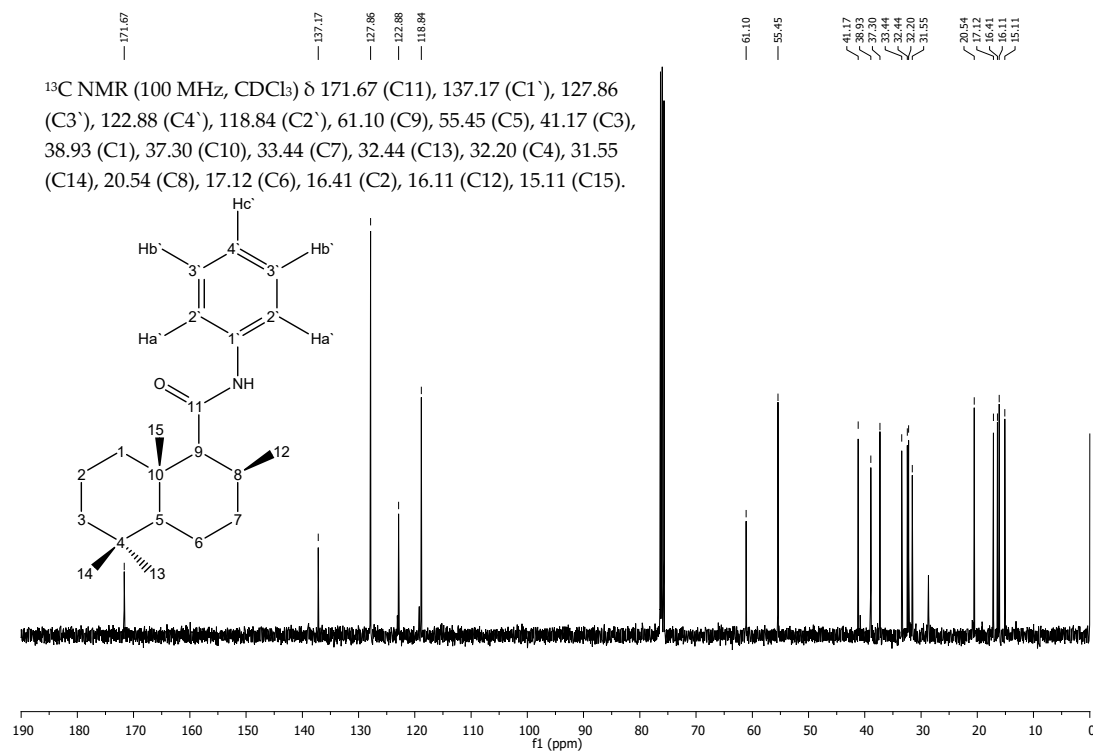

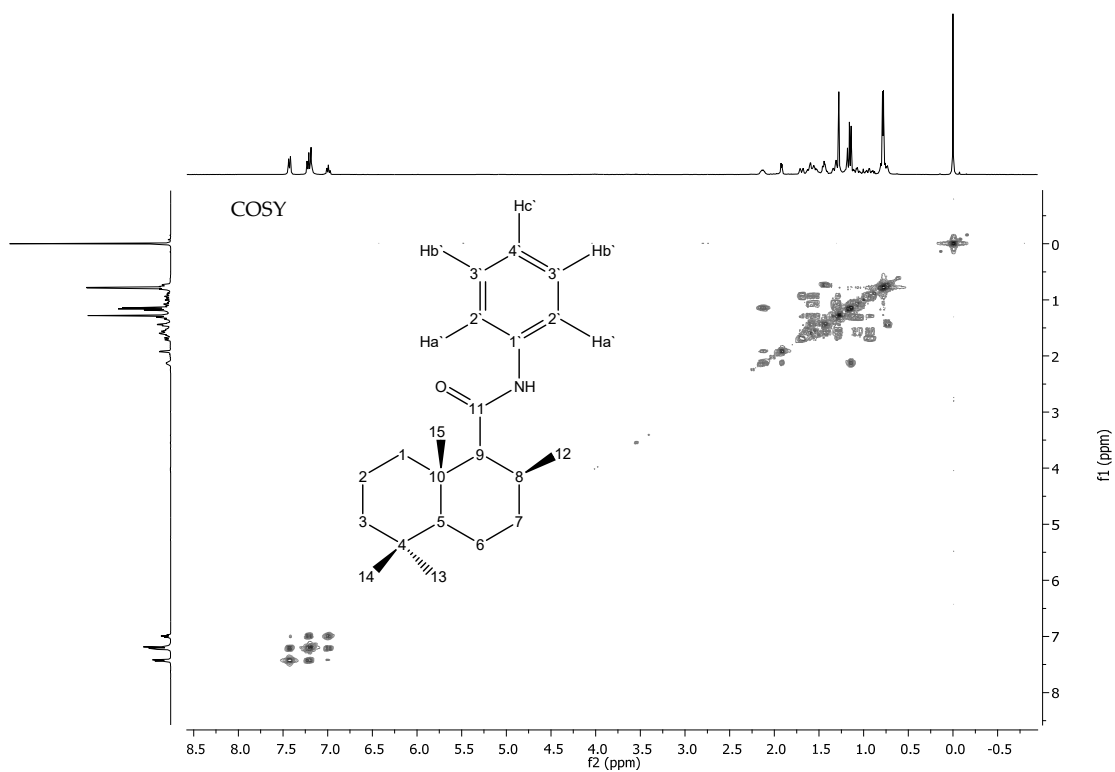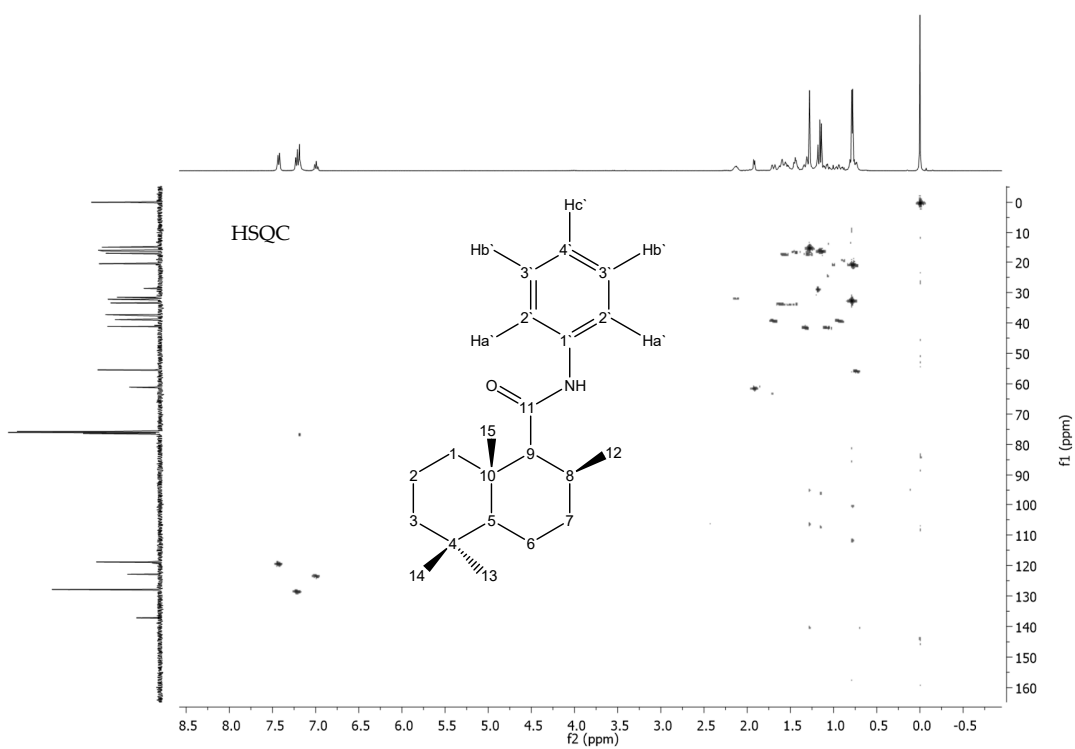

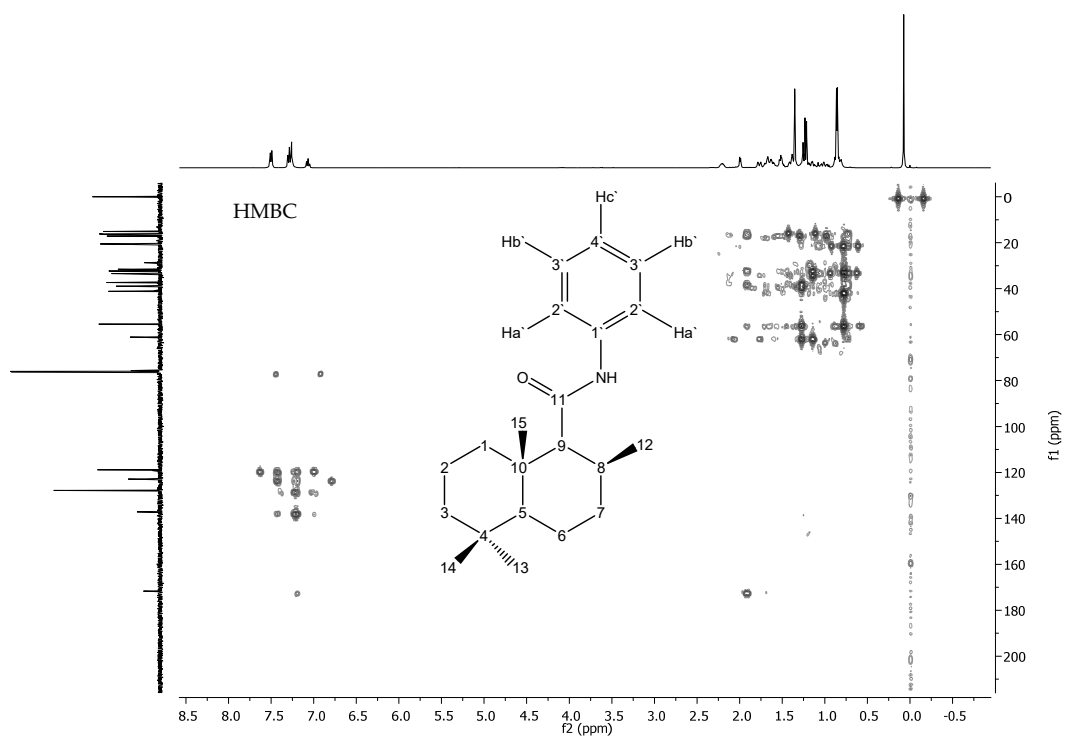

**Compound 5:** 2,5,5,8a-tetramethyl-N-(3,4-dimethylphenyl)decahydronaphthalene-1-carboxamide or N-(3,4-dimethylphenyl)-driman-9-carboxamide.

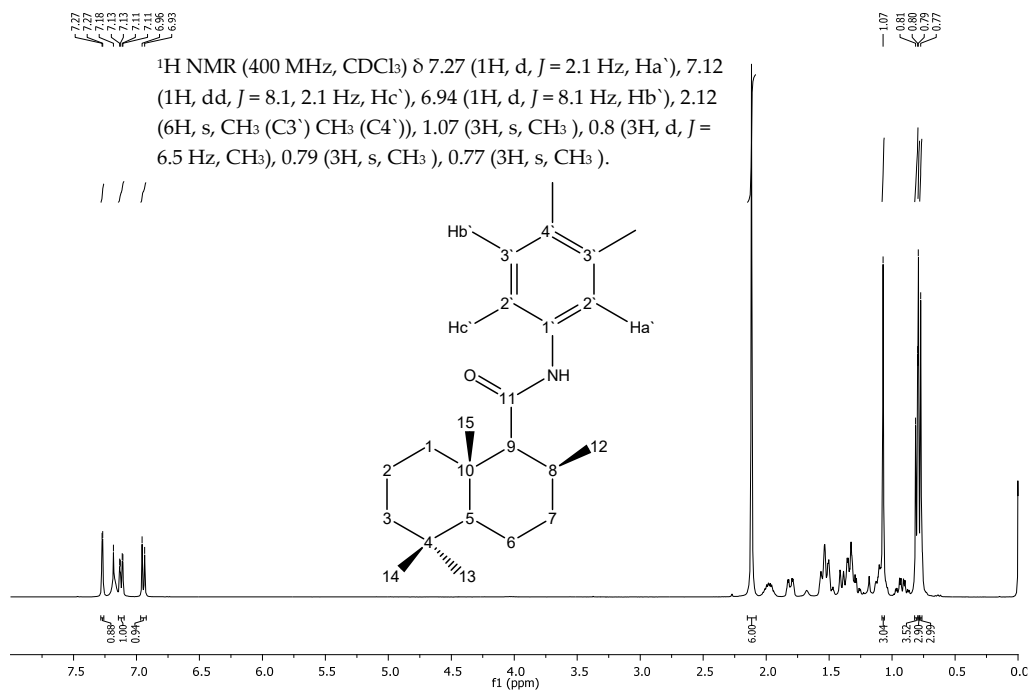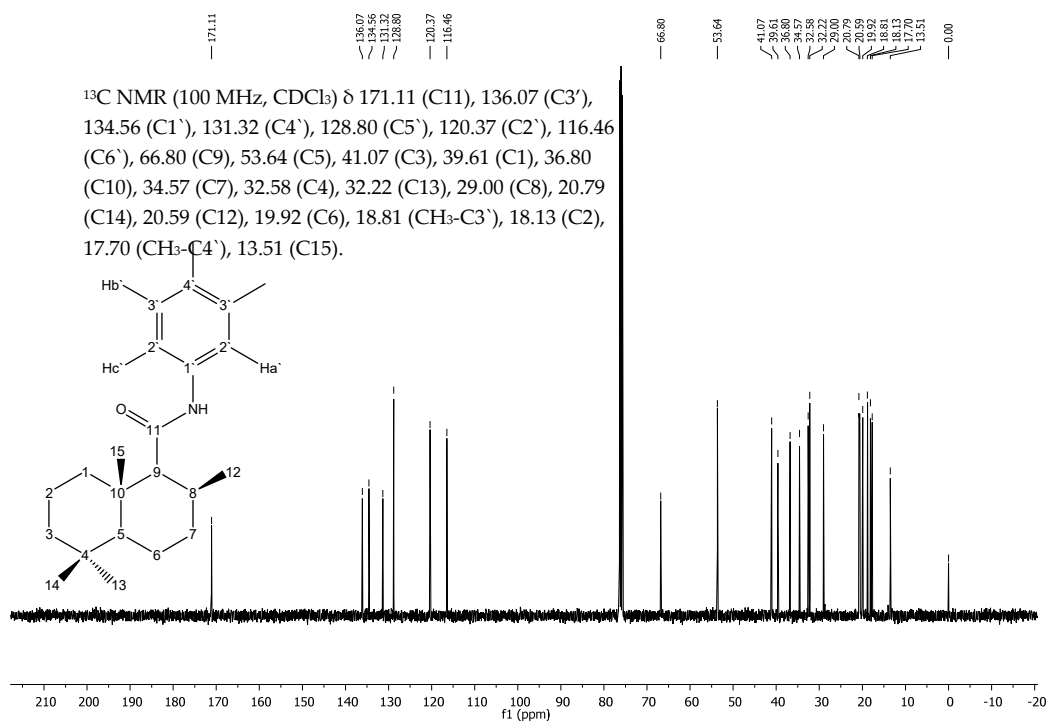

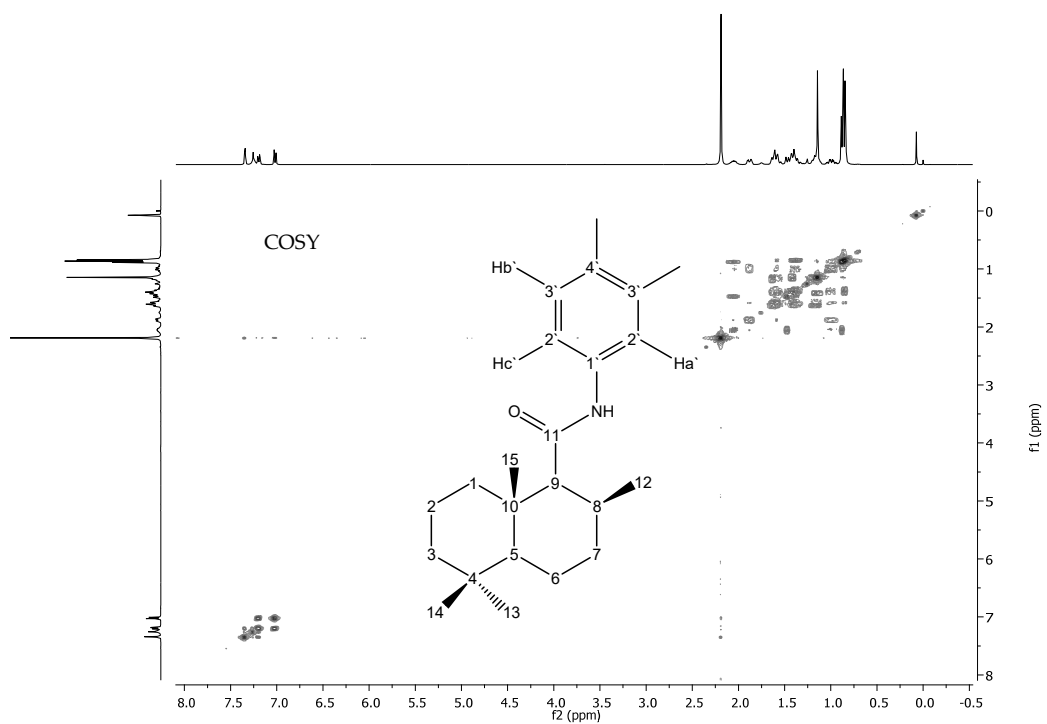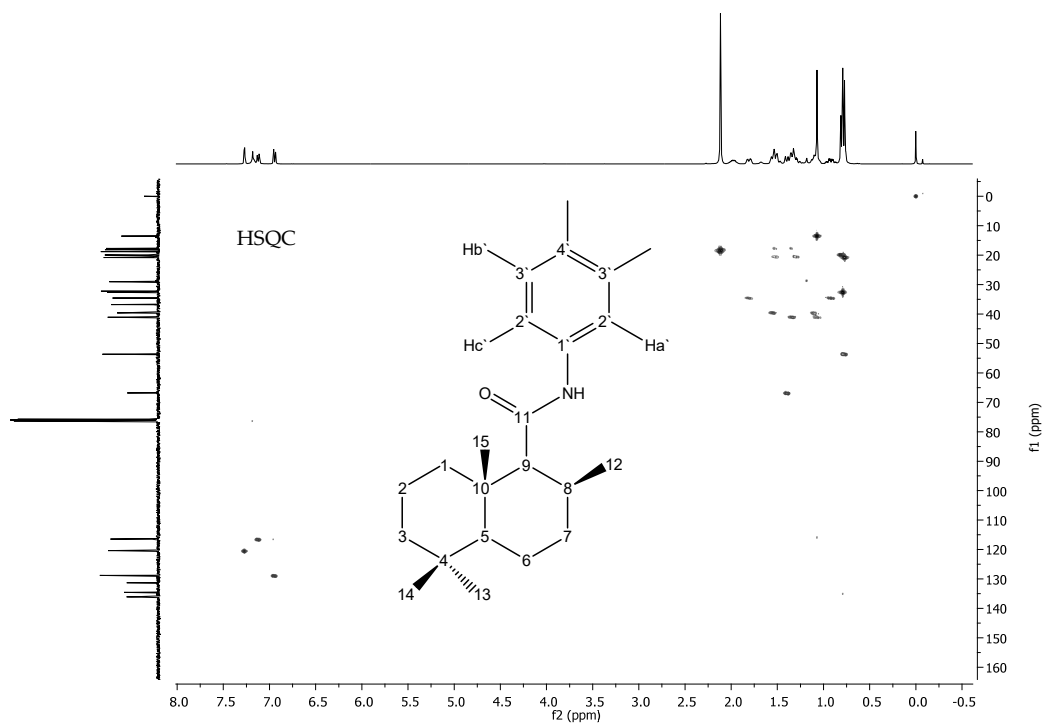

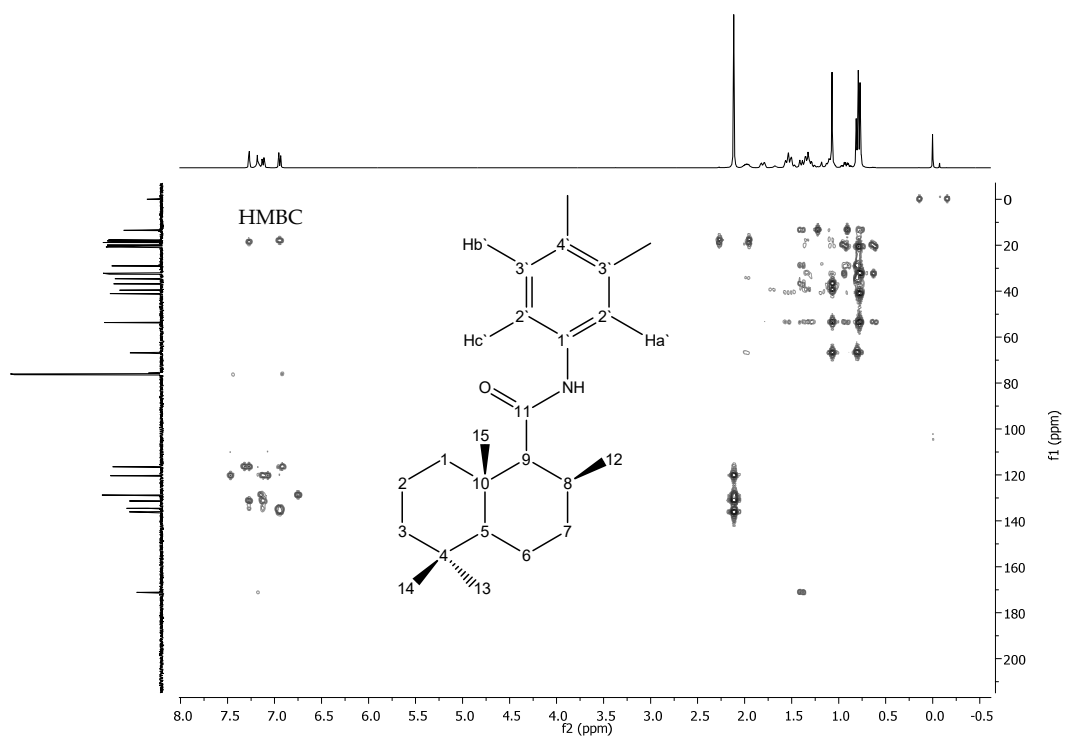

**Compound 6:** 2,5,5,8a-tetramethyl-N-(3,4-dimethoxyphenyl)decahydronaphthalene-1-carboxamide or N-(3,4-dimethoxyphenyl)-driman-9-carboxamide.

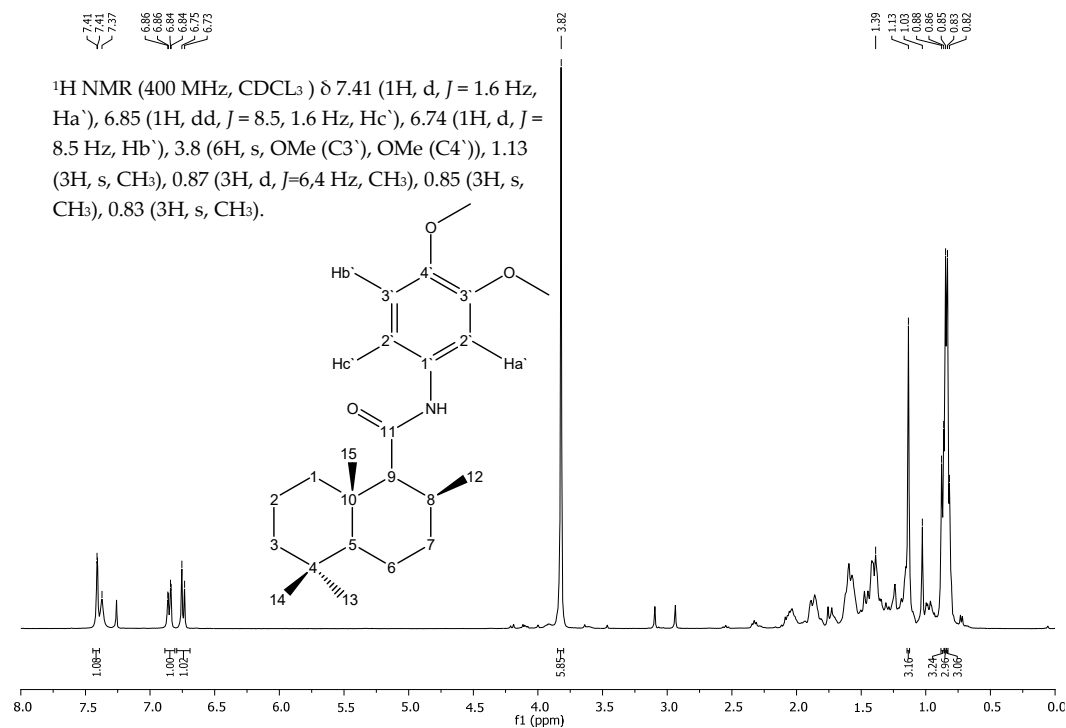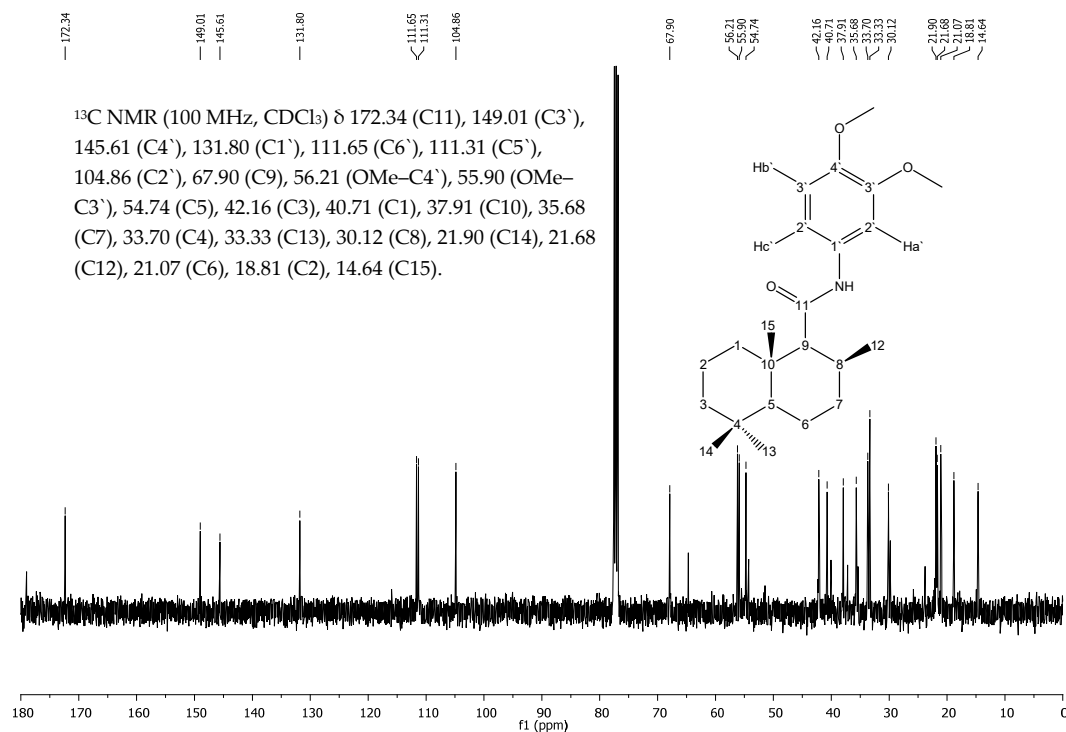

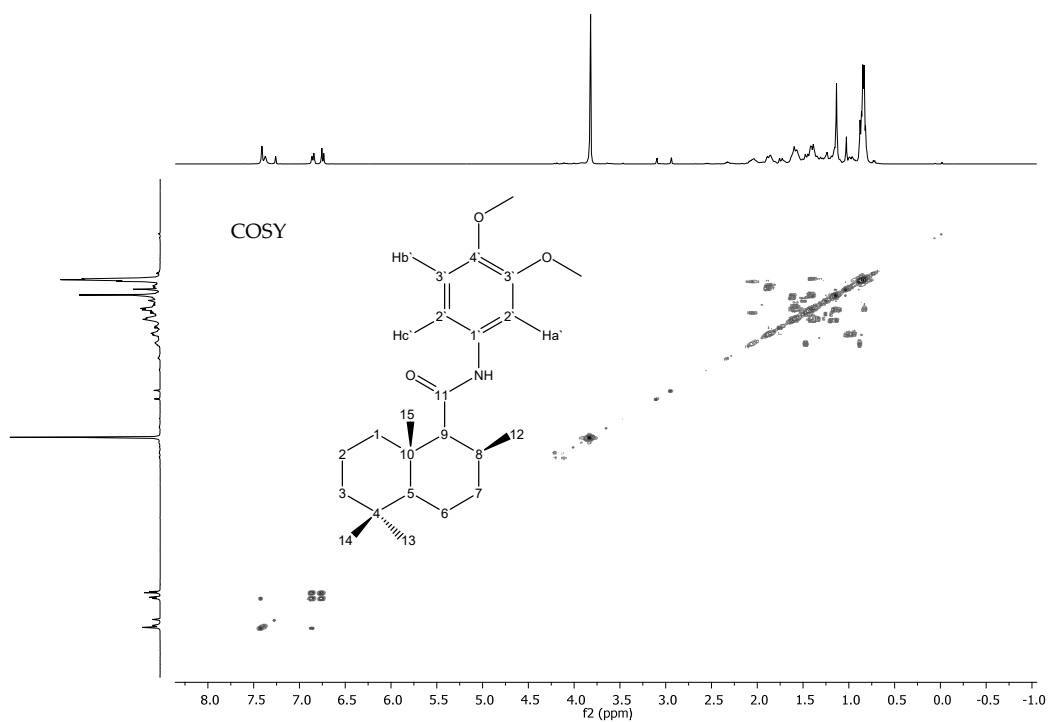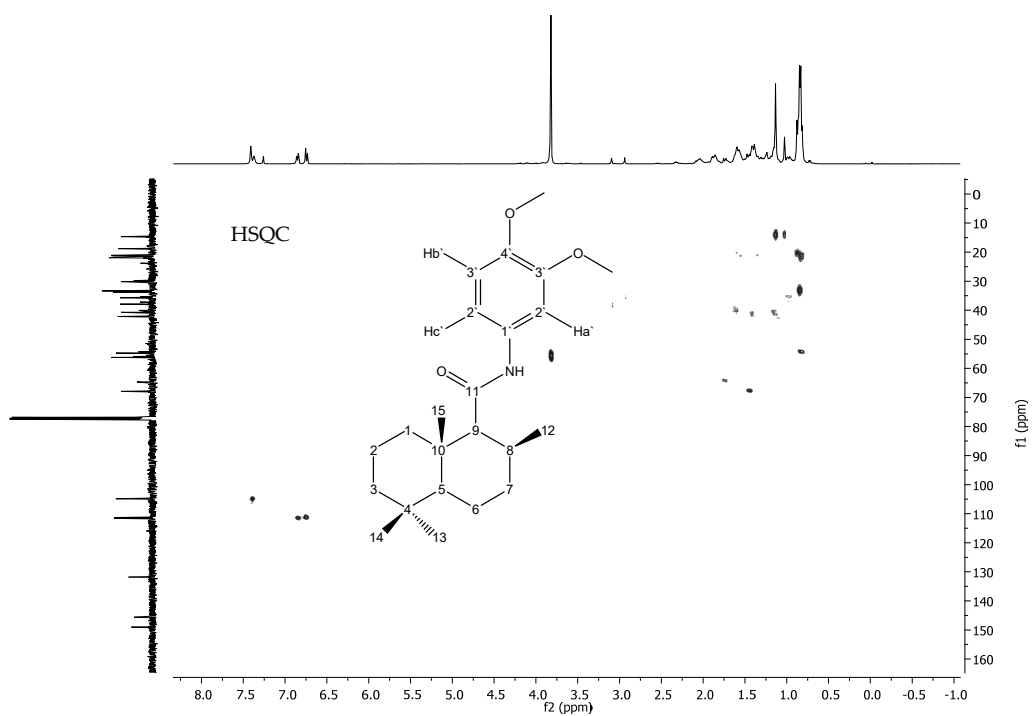



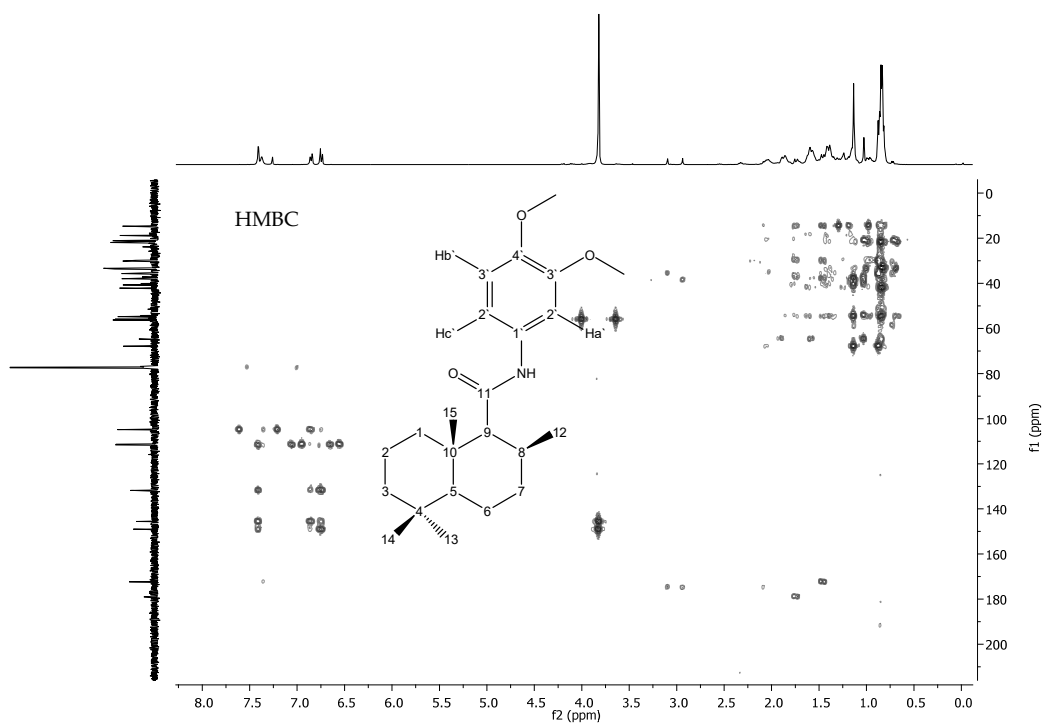

**Compound 7:** 2,5,5,8a-tetramethyl-N-(3,4-dichlorophenyl)decahydronaphthalene-1-carboxamide or N-(3,4-dichlorophenyl)-driman-9-carboxamide.

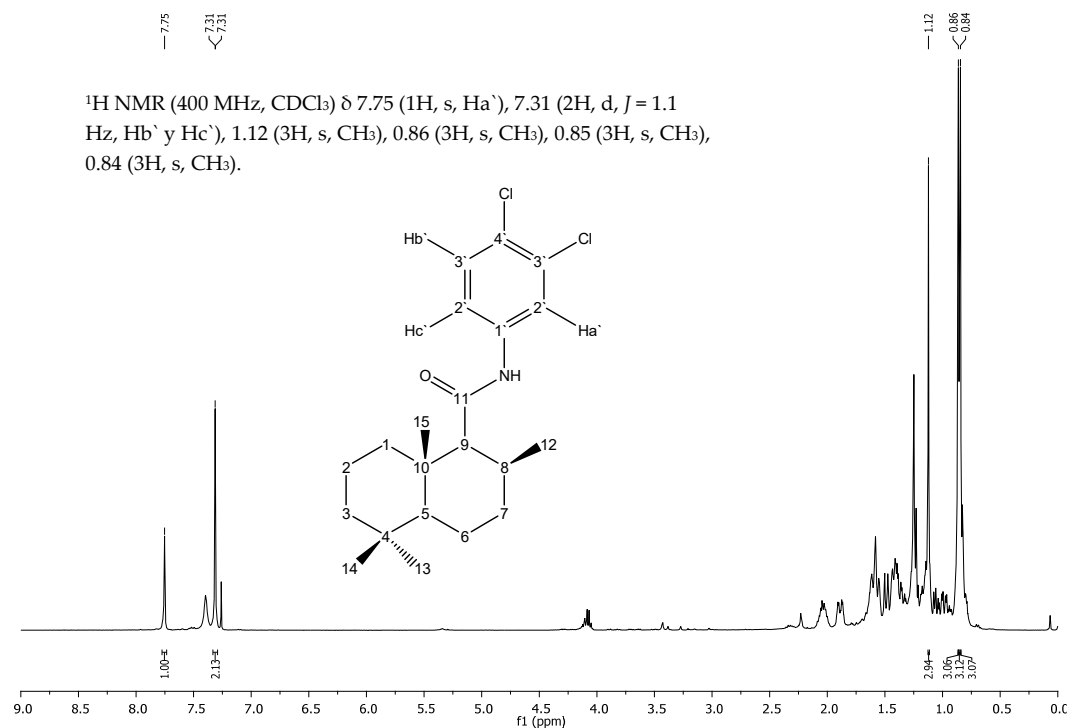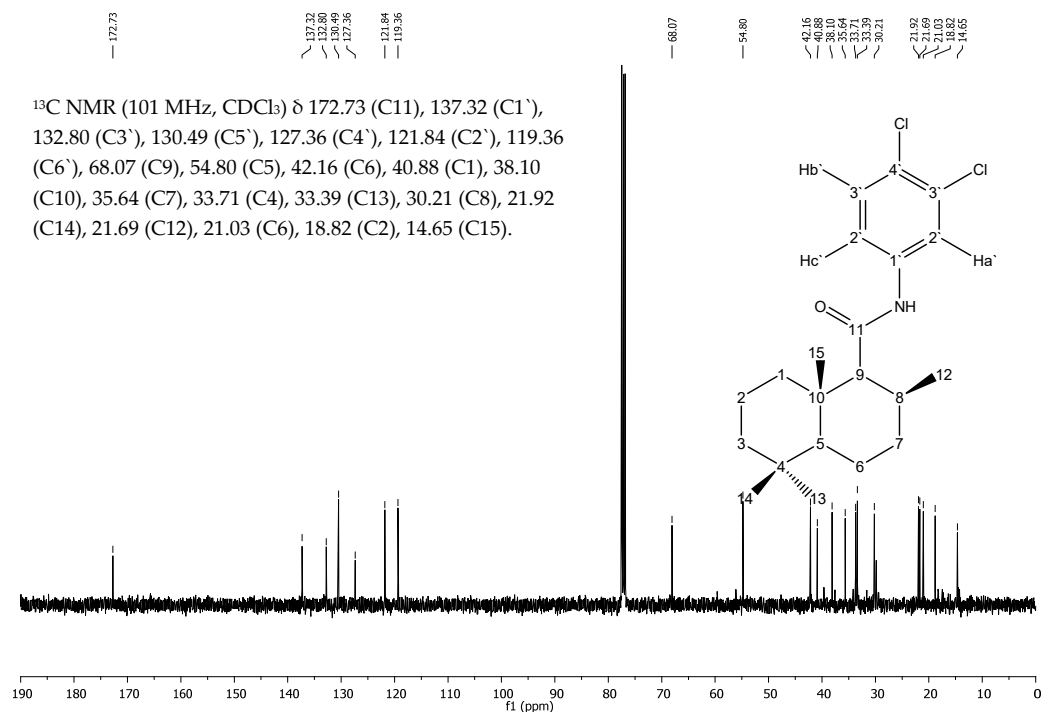

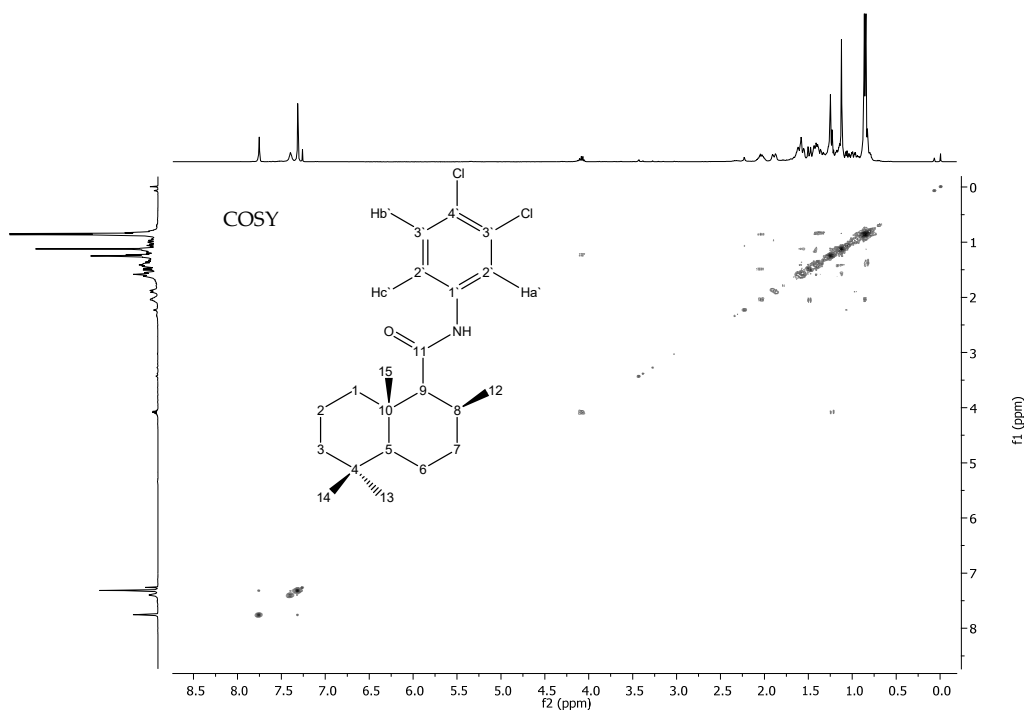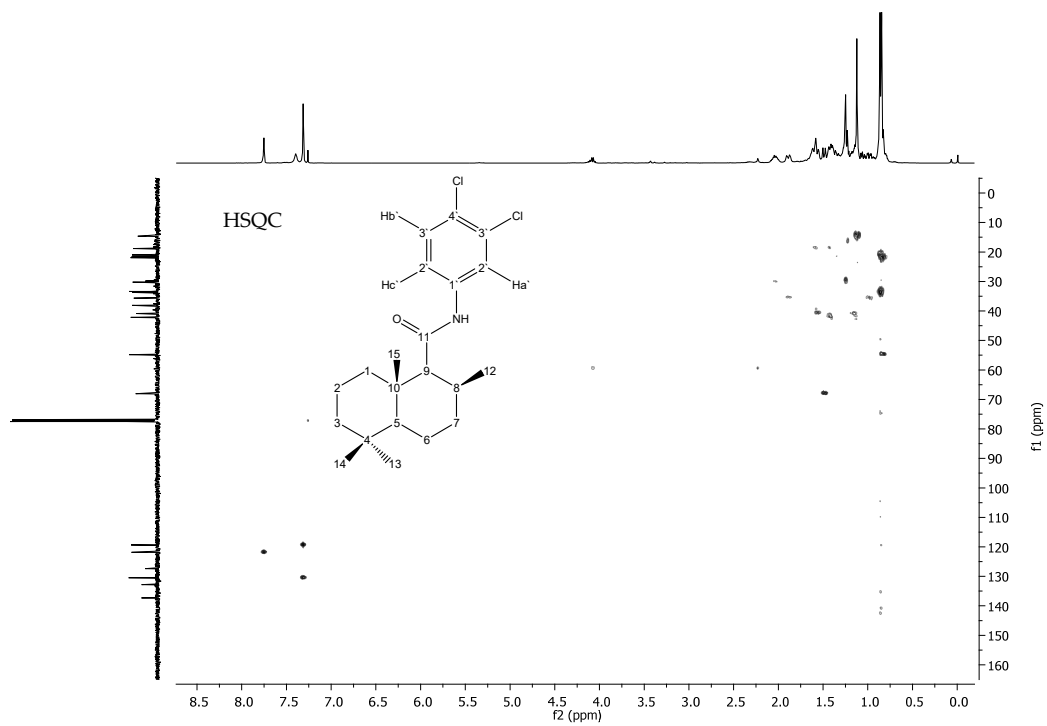

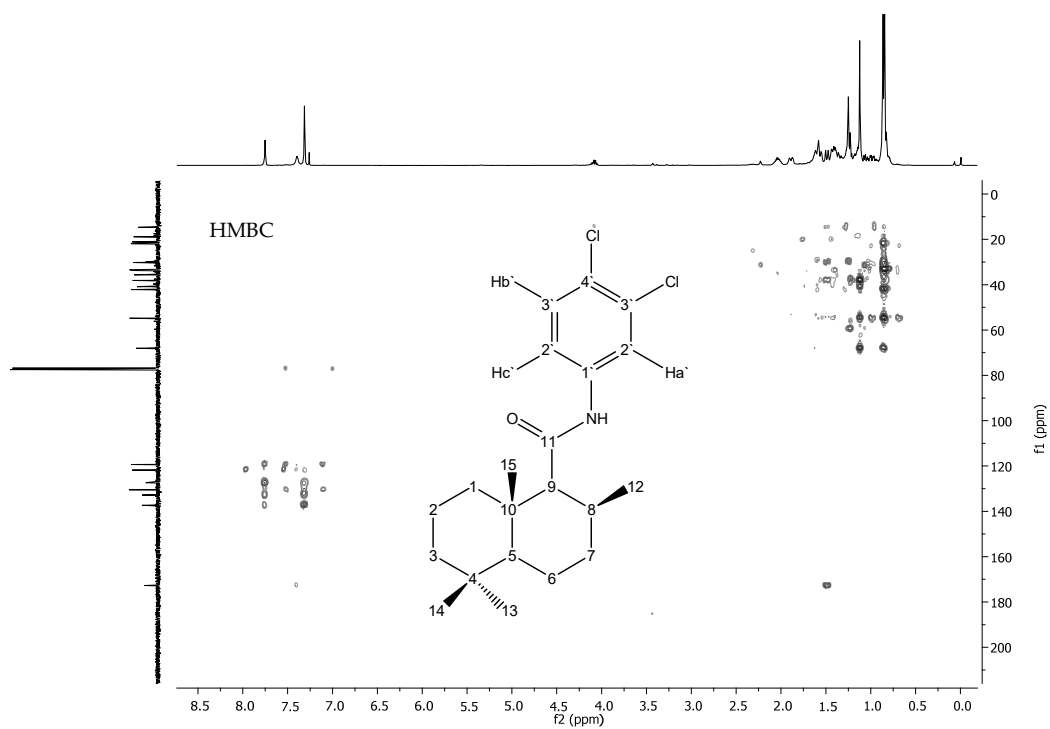

**Compound 8:** 2,5,5,8a-tetramethyl-N-(3,5-dimethoxyphenyl)decahydronaphthalene-1-carboxamide or N-(3,5-dimethoxyphenyl)-driman-9-carboxamide.

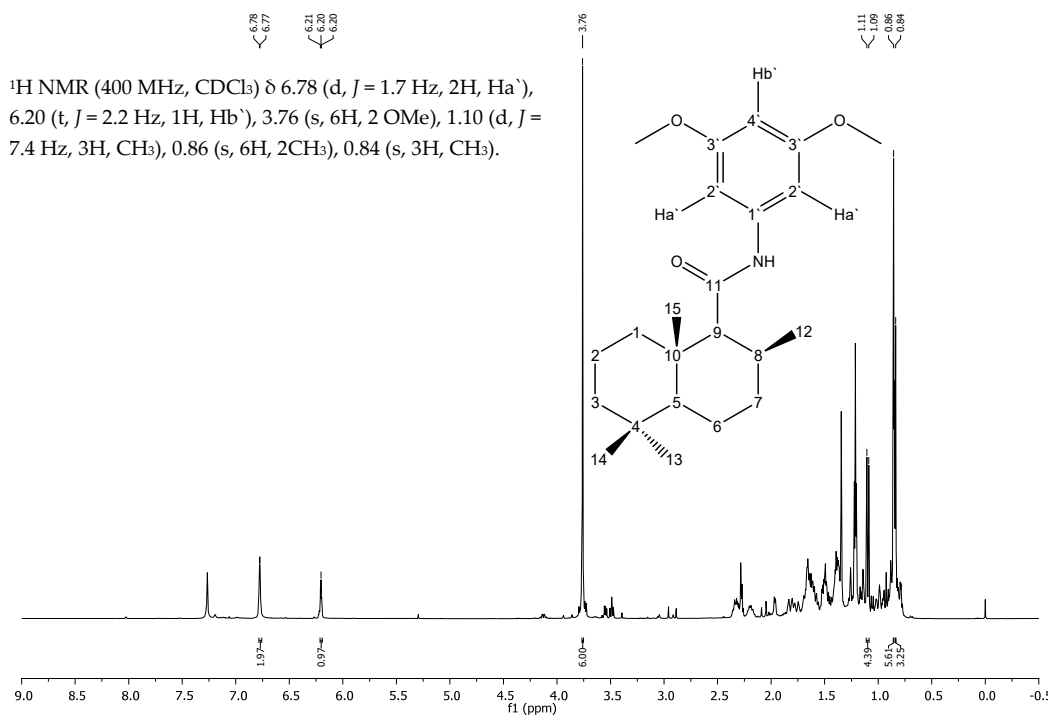

**Compound 9:** 2,5,5,8a-tetramethyl-N-(3,5-dichlorophenyl)decahydronaphthalene-1-carboxamide or N-(3,5-dichlorophenyl)-driman-9-carboxamide.

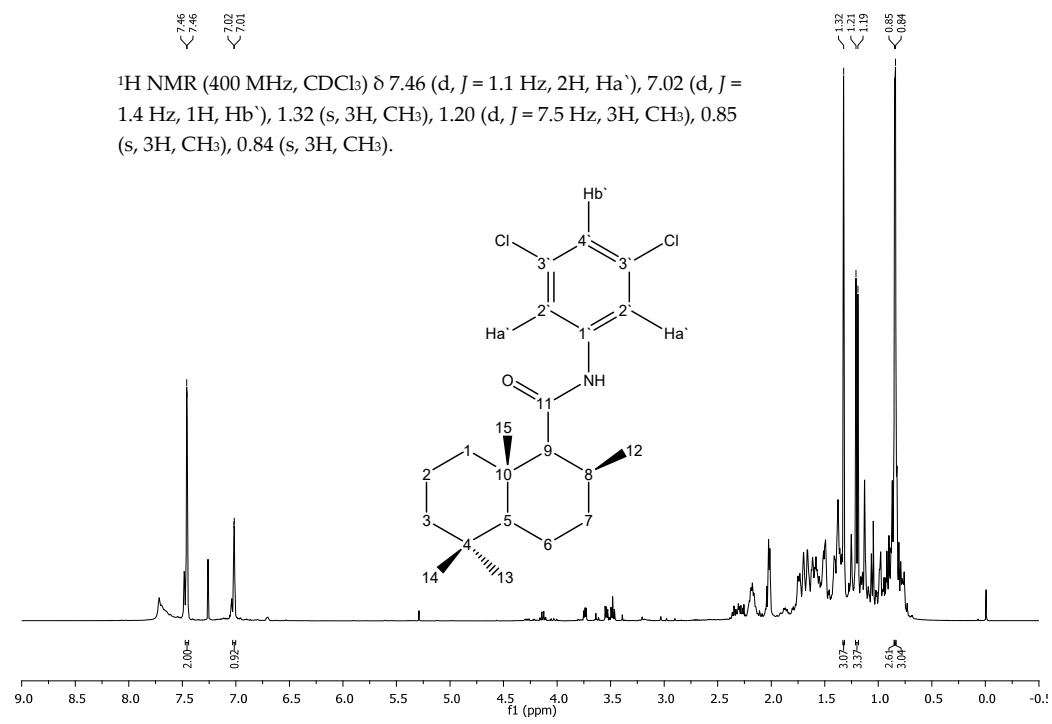

**Compound 10:** 2,5,5,8a-tetramethyl-N-(4-methylphenyl)decahydronaphthalene-1-carboxamide or N-(4-methylphenyl)-driman-9-carboxamide

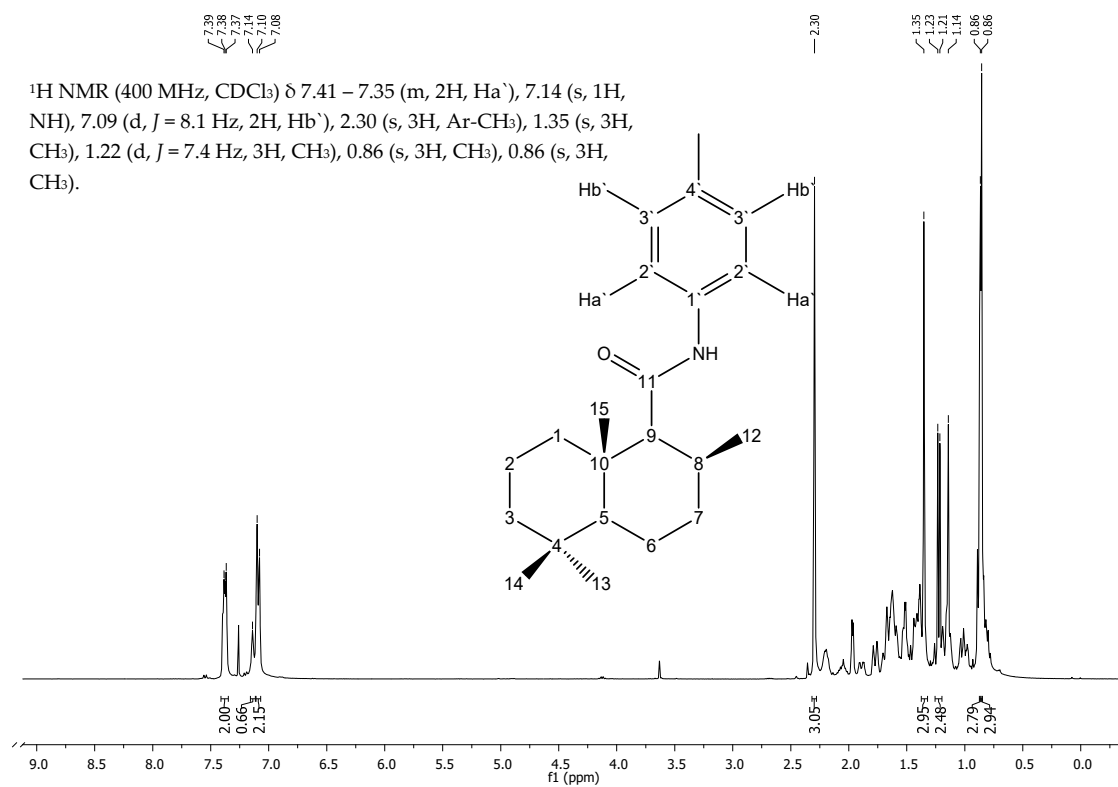

**Compound 11:** 2,5,5,8a-tetramethyl-N-(3-methylphenyl)decahydronaphthalene-1-carboxamide or N-(3-methylphenyl)-driman-9-carboxamide.

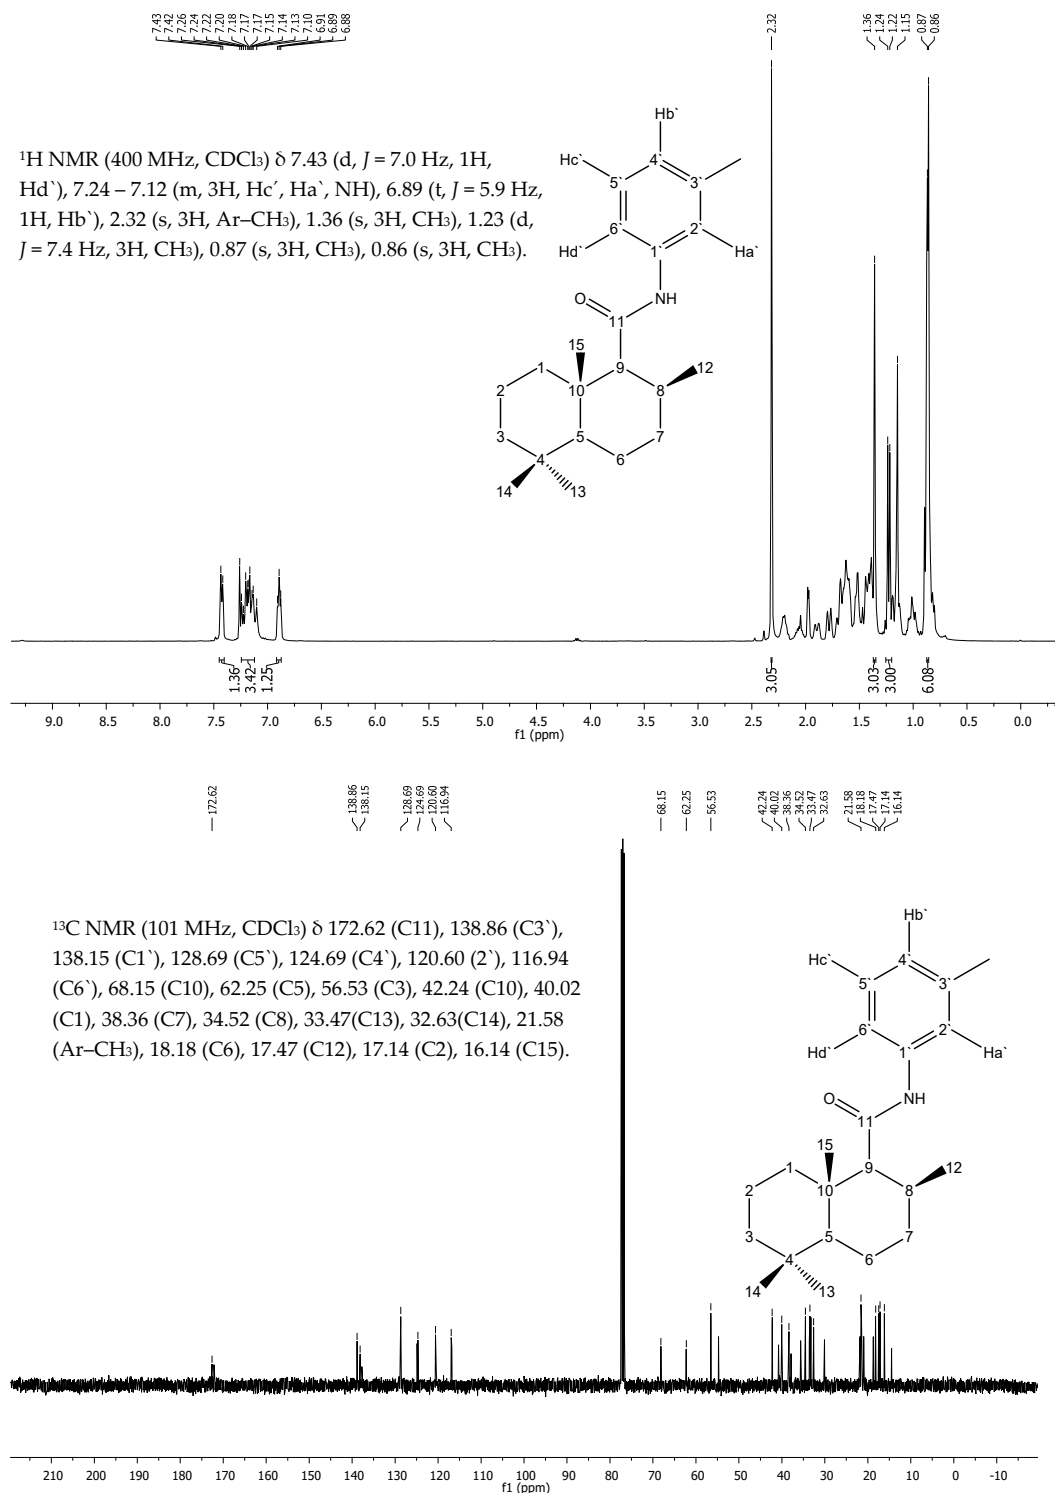



**Compound 12:** 2,5,5,8a-tetramethyl-N-(4-methoxyphenyl)decahydronaphthalene-1-carboxamide or N-(4-methoxyphenyl)-driman-9-carboxamide

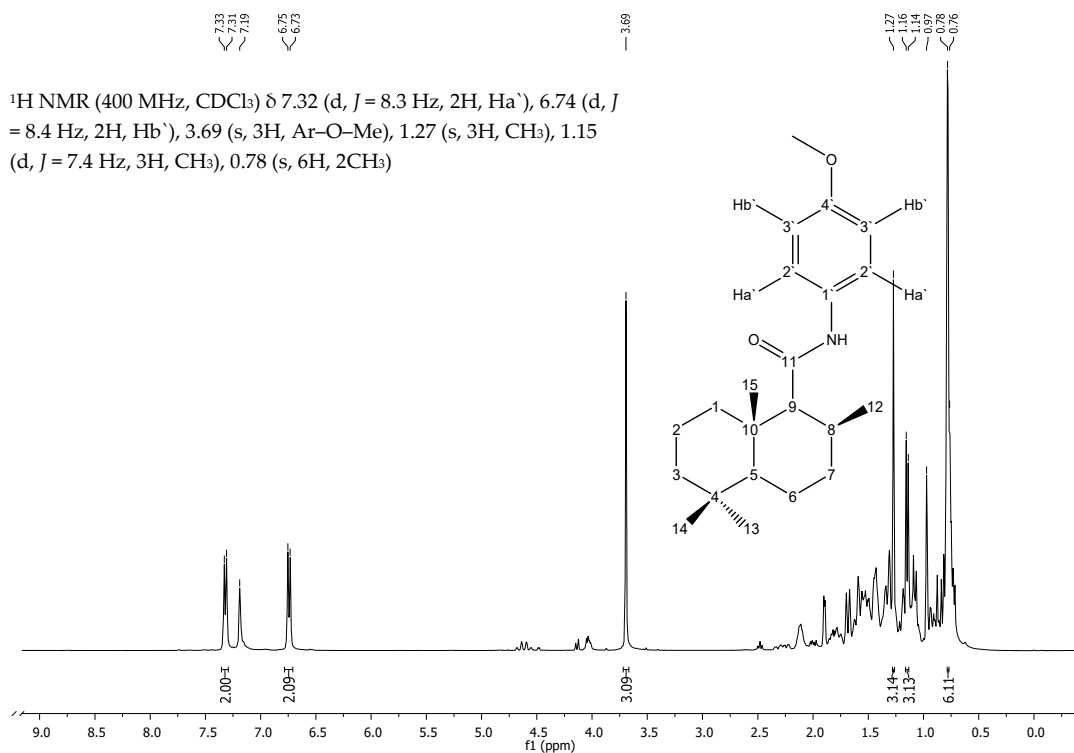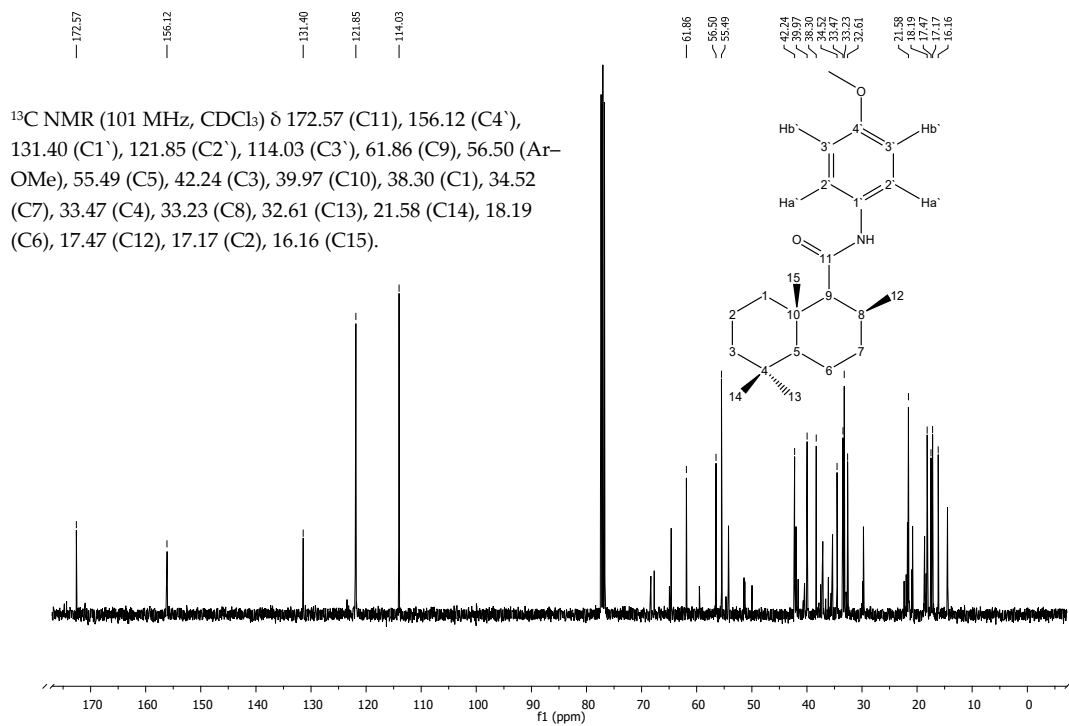

**Compound 13:** 2,5,5,8a-tetramethyl-N-(3-methoxyphenyl)decahydronaphthalene-1-carboxamide or N-(3-methoxyphenyl)-driman-9-carboxamide.

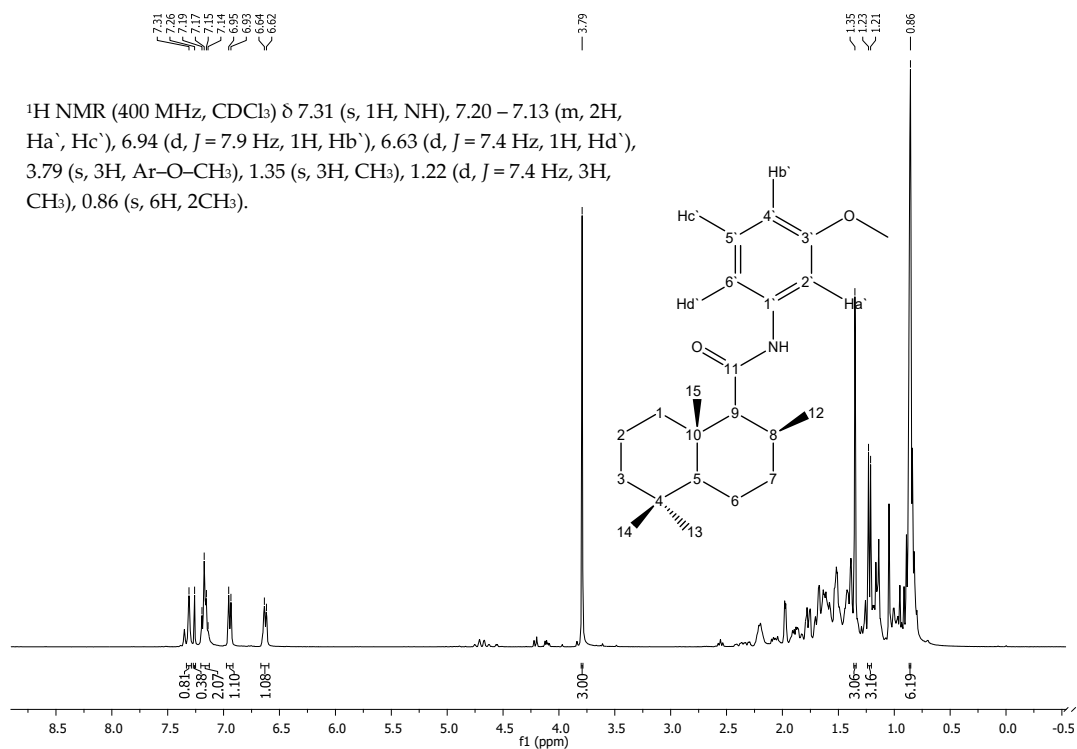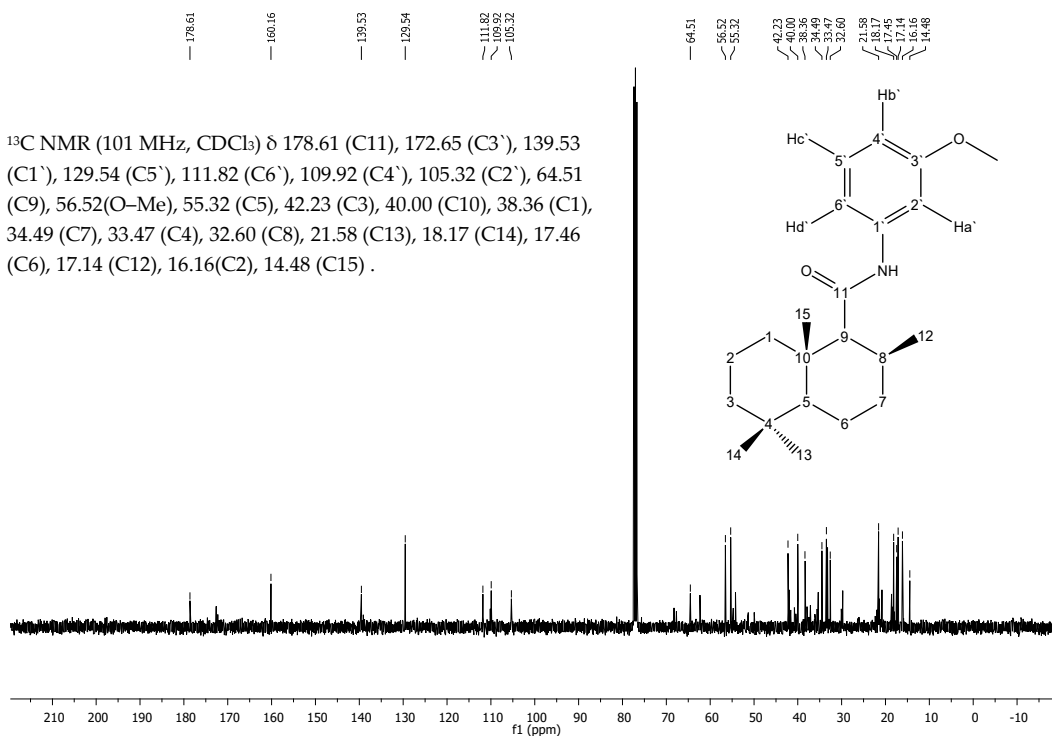

**Compound 14:** 2,5,5,8a-tetramethyl-N-(4-chlorophenyl)decahydronaphthalene-1-carboxamide or N-(4-chlorophenyl)-driman-9-carboxamide.

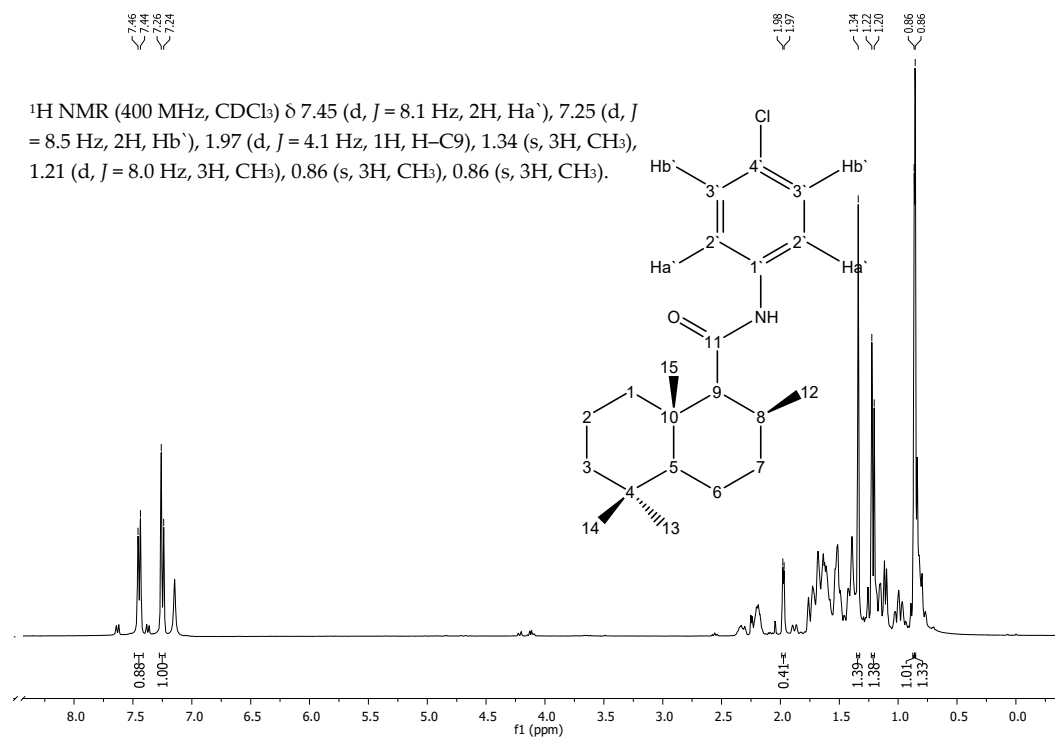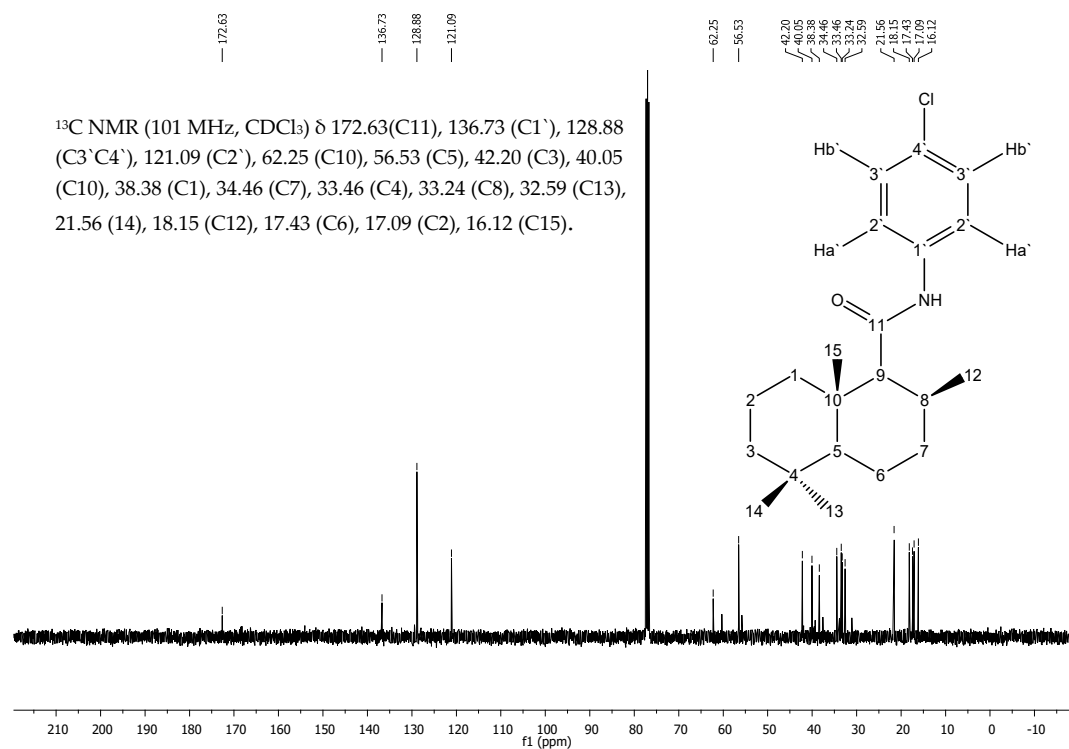

**Compound 15:** 2,5,5,8a-tetramethyl-N-(3-chlorophenyl)decahydronaphthalene-1-carboxamide or N-(3-chlorophenyl)-driman-9-carboxamide.

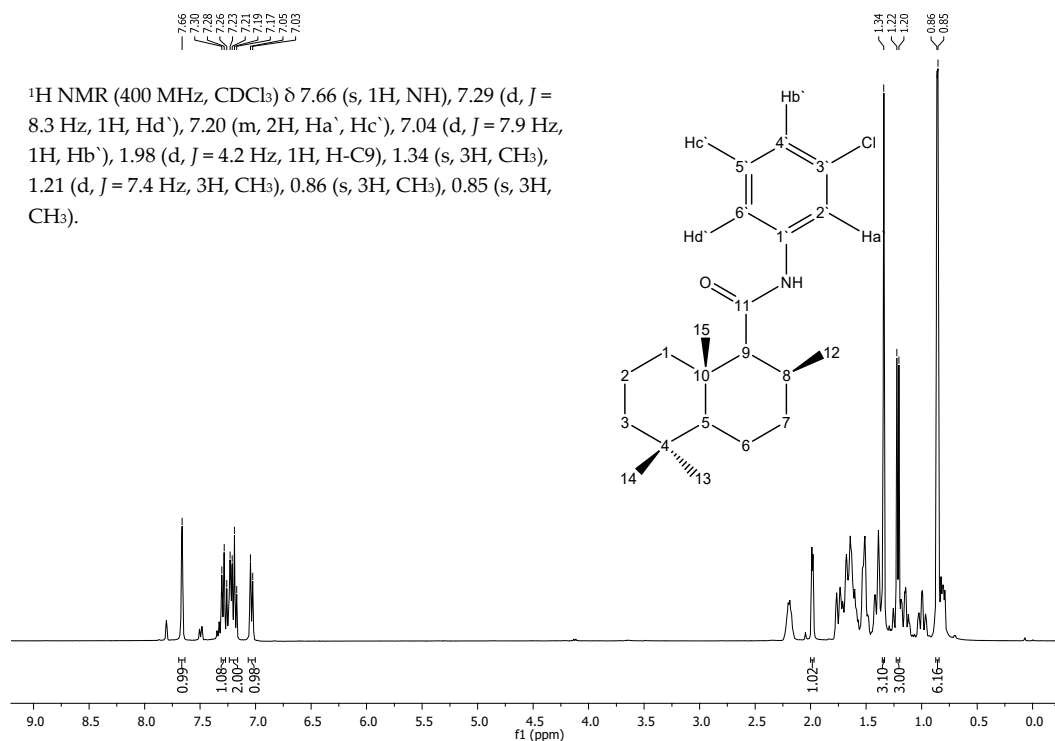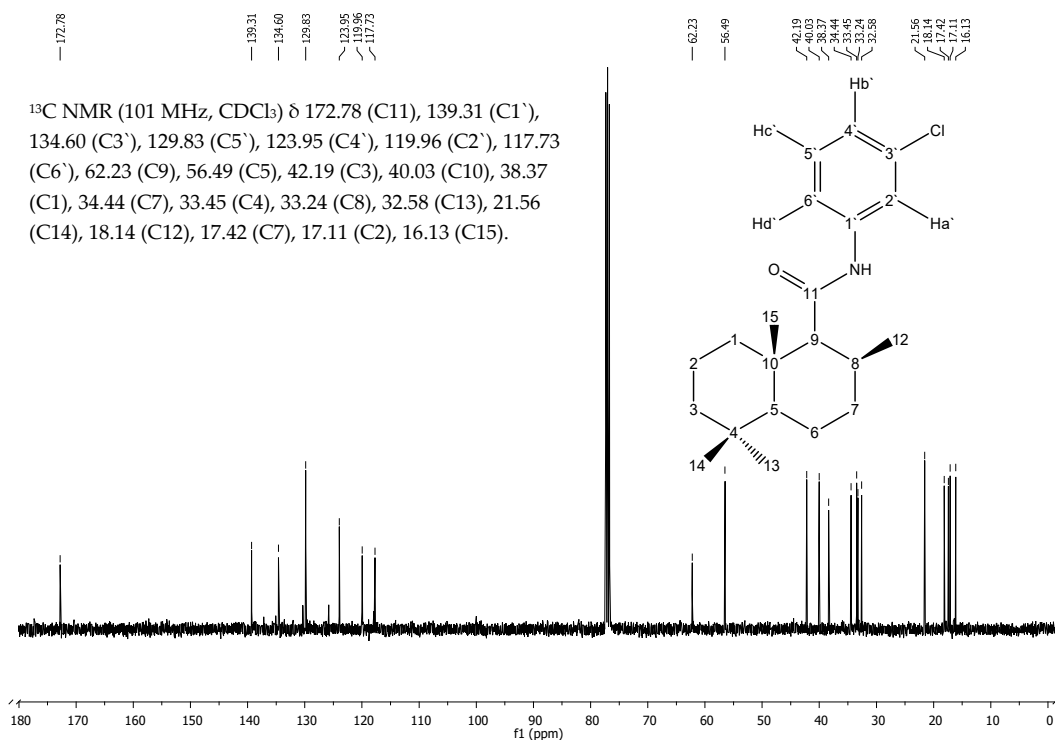

Supplement: s1 [file s1]
